# Supplementary material for: Molecular imprinting as a simple way for the long-term maintenance of the stemness and proliferation potential of adipose-derived stem cells: an in vitro study
Source: Royal Society of Chemistry journal article supplement (doi:10.1039/d2tb00279e), 2022-01-01
Supplement: d2tb00279e1.pdf [file d2tb00279e1.pdf]

## Supplementary Figures

### **Molecular imprinting as a simple way for long-term maintenance of the stemness and proliferation potential of adipose-derived stem cells: an in vitro study**

Abolfazl Nazbar, Saeed Samani, Sepideh Yazdian Kashani<sup>\*</sup>, Amir Amanzadeh, Shahram Shoeibi, Shahin Bonakdar<sup>\*</sup>

\* Corresponding authors:

Sepideh Yazdian Kashani: [ykashani@aut.ac.ir](mailto:ykashani@aut.ac.ir)

Shahin Bonakdar: [sh\\_bonakdar@pasteur.ac.ir](mailto:sh_bonakdar@pasteur.ac.ir)

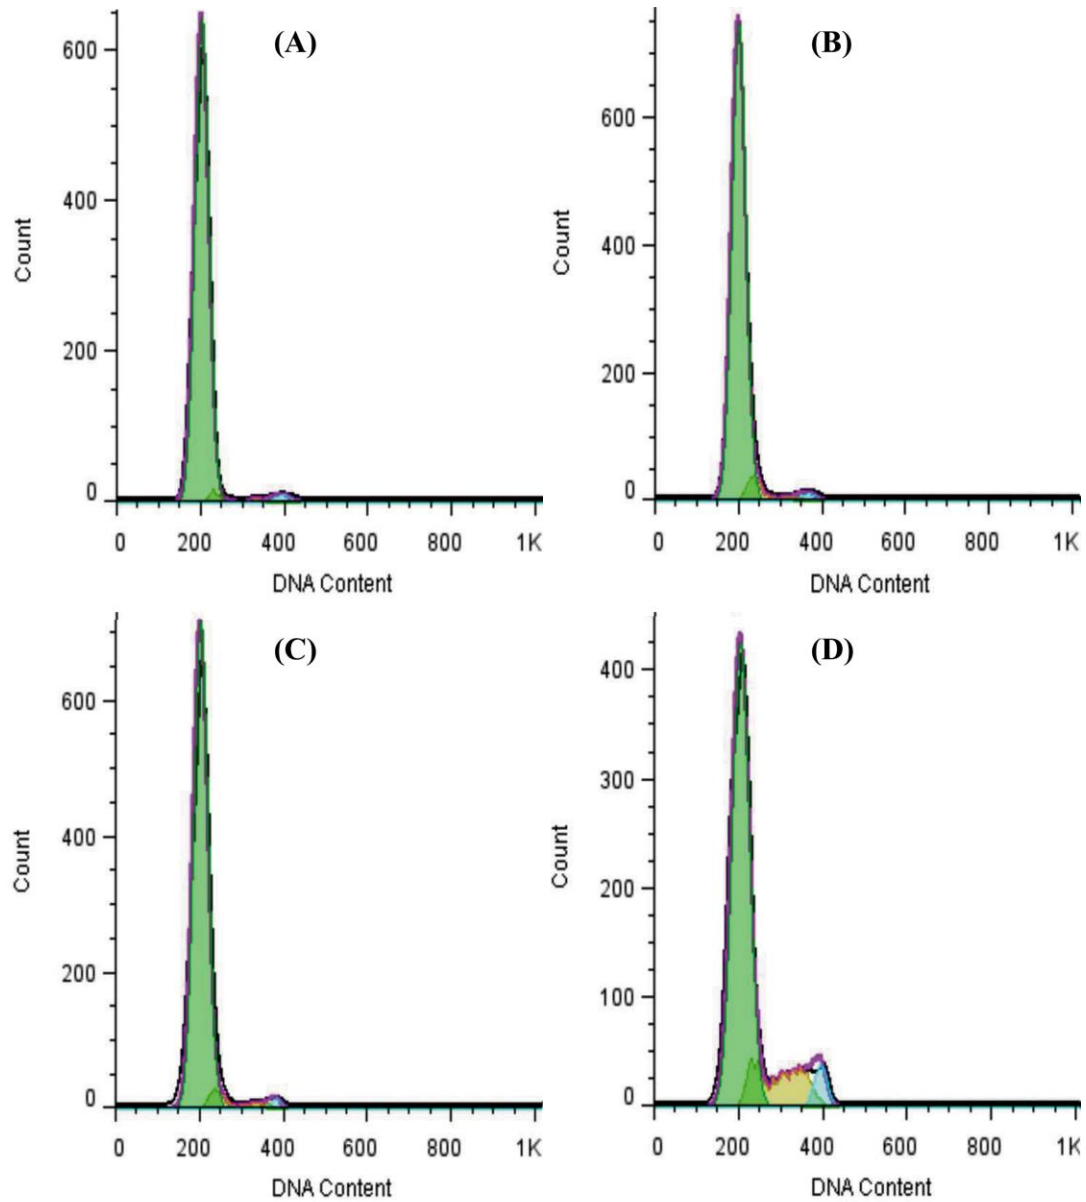

Fig. S1- Cell cycle analysis. (A) Freshly isolated ADSCs (B) ADSCs after eight subcultures on TCP (C) ADSCs after eight subcultures on non-patterned PDMS (D) ADSCs after eight subcultures on ADSC-imprinted PDMS.

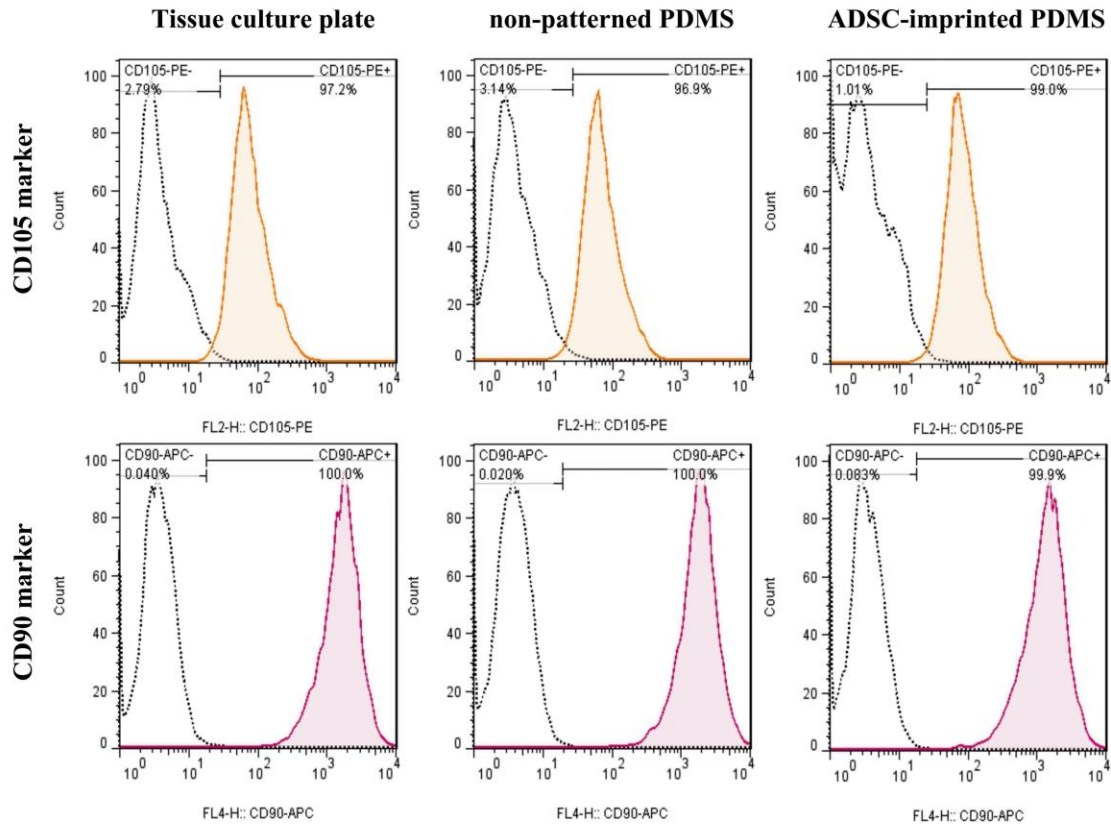

Fig. S2- Flow cytometry results for CD105 and CD90 markers after 8 weeks of ADSCs cultured on different substrates in DMEM. ADSC stands for adipose-derived stem cell. The dotted black lines are attributed to isotype controls.

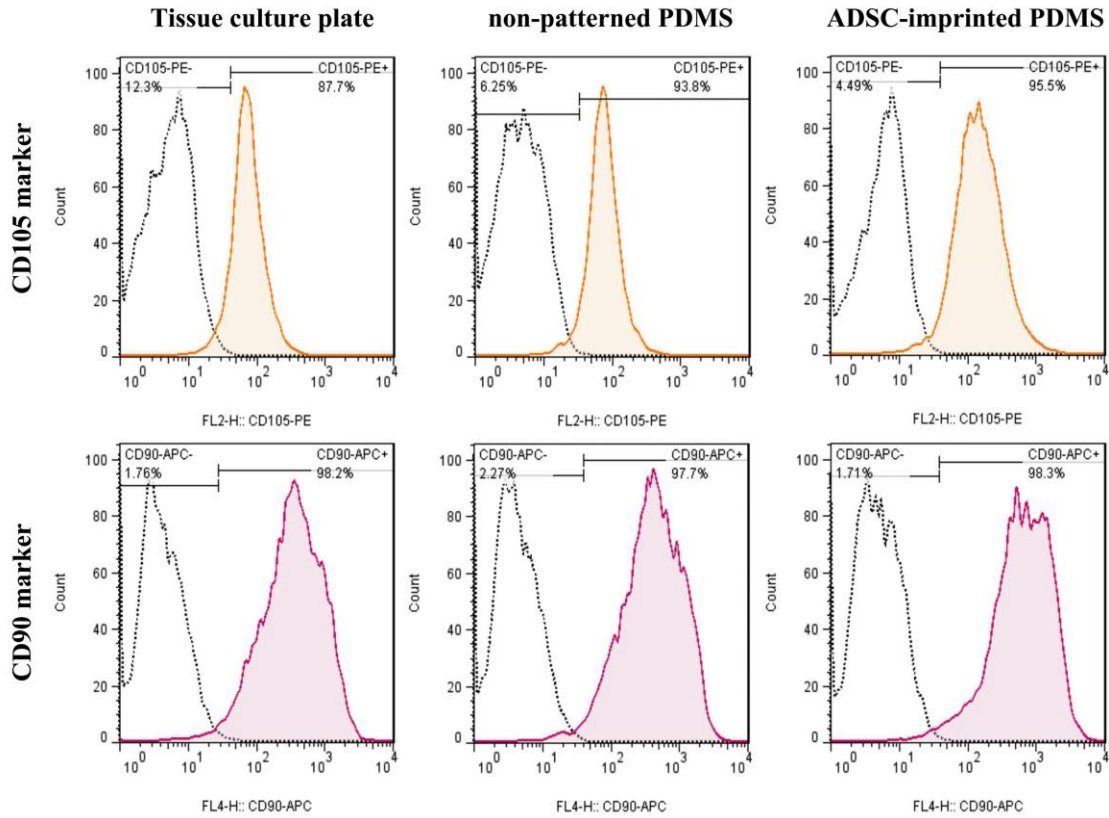

Fig. S3- Flow cytometry results for CD105 and CD90 markers after 14 days of ADSCs cultured on different substrates in adipogenic medium. ADSC stands for adipose-derived stem cell. The dotted black lines are attributed to isotype controls.
